# Supplementary material for: Co-assemblies of micelle-forming diblock copolymers and enzymes on graphite substrate for an improved design of biosensor systems
Source: Royal Society of Chemistry journal article supplement (doi:10.1039/c2sm27298a), 2013-01-01
Supplement: c2sm27298a.pdf [file c2sm27298a.pdf]

## Supplementary Information

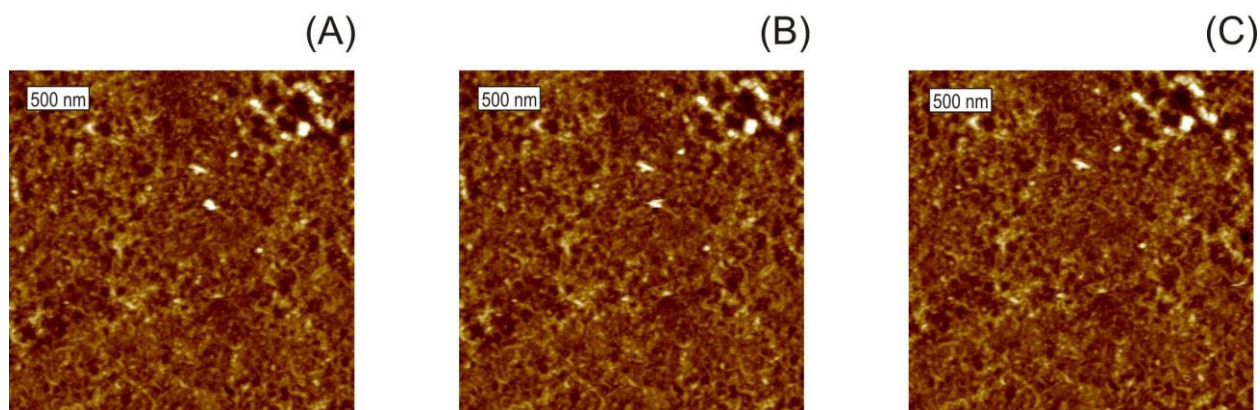

Fig. SI1. The  $3 \times 3 \mu\text{m}$  AFM height images of a PB-*b*-PDMAEMA/Tyr film taken on the same spot of the sample by scanning in pH 7 buffer for 1.5 h. The AFM images (A), (B) and (C) correspond to immersion times in pH 7 buffer of 30, 60 and 90 min, respectively. Conditions: the time for the copolymer and the enzyme adsorption was 1 h and 10 min, respectively. The concentration of the copolymer was 5 mg/ml, the concentration of the enzyme was  $2 \times 10^{-4}$  M. Height range is 50 nm.

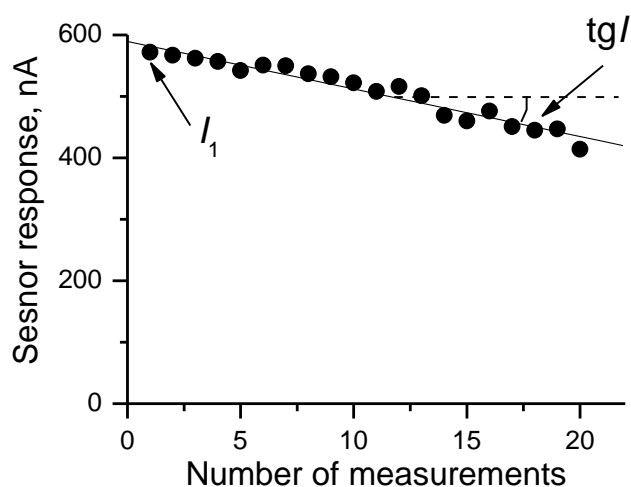

Fig SI2. The analytical signals of sensor surface for consecutive measurements of standard analyte concentration. The operational stability was characterized quantitatively as a percentage of the analytical signal change per a single measurement and was calculated according to the formula:  $\Delta I = 100\% \times \text{tg}I / I_1$ , where  $\text{tg}I$  is the slope of the dependence of the analytical signal on the number of repeated measurements normalized to the initial analytical signal  $I_1$  and given in percents.
